# Supplementary material for: Templated gold nanocaps for surface-enhanced Raman scattering (SERS) sensors based on monolayer polystyrene colloidal arrays
Source: Royal Society of Chemistry journal article supplement (doi:10.1039/d4nj01150c), 2024-01-01
Supplement: d4nj01150c1.pdf [file d4nj01150c1.pdf]

## Electronic Supplementary Material

### Templated gold nanocaps for surface-enhanced Raman scattering (SERS) sensors based on monolayer polystyrene colloidal arrays

Yunjie Xia,<sup>a</sup> Mengnan Sun,<sup>a</sup> Rongjian Huang,<sup>b,c</sup> Shuyan Qi,<sup>b,c</sup> Li Zhang,<sup>b,c</sup> Yaru Jia,<sup>b,c</sup> Zihou Li,<sup>b,c</sup> Huilin Xu,<sup>b,c</sup> Mingkun Wang,<sup>b,c</sup> Wei Huang,<sup>b,c</sup> Jiantao Zhang,<sup>\*b,c</sup>, Aiguo Wu<sup>\*a, b,c</sup> and Bo Chen<sup>\*b,c</sup>

*a* Cixi Biomedical Research Institute, Wenzhou Medical University, Ningbo 315302, China

*b* Institute of Biomedical Engineering, Ningbo Institute of Materials Technology and Engineering, Chinese Academy of Sciences, Ningbo 315201, China

*c* Ningbo Cixi Institute of Biomedical Engineering, Ningbo 315300, China

Supporting information to DOI : <https://doi.org/10.1039/d4nj01150c>

Address correspondence to Jiantao Zhang, [zhangjiantao@nimte.ac.cn](mailto:zhangjiantao@nimte.ac.cn); Aiguo Wu, [aiguo@nimte.ac.cn](mailto:aiguo@nimte.ac.cn); Bo chen, [chenbo@nimte.ac.cn](mailto:chenbo@nimte.ac.cn)

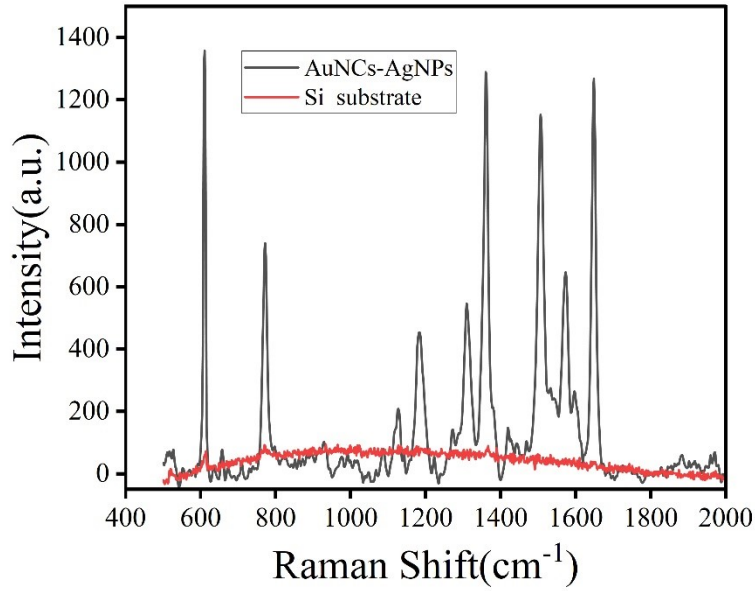

Figure S1. SERS spectra of R6G ( $1.0 \times 10^{-3}$  M) absorbed on the AgNPs-AuNCs (black line) and Si substrate (red line). The excitation laser wavelength for Raman measurements is 532 nm, the laser power is 0.1 %, and the acquisition time is 3 s.

To quantitatively evaluate the SERS enhancement factor (EF) of the convex AgNPs-AuNCs substrate, the SERS EF value of R6G was calculated by this equation<sup>51-53</sup>:

$$EF = \frac{I_{SERS}}{I_{REF}} \cdot \frac{N_{REF}}{N_{SERS}}$$

Where  $I_{SERS}$  is the SERS intensity of band of  $614 \text{ cm}^{-1}$  of  $1 \times 10^{-3}$  M R6G on the AuNCs-AgNPs,  $I_{REF}$  is the normal Raman intensity of  $614 \text{ cm}^{-1}$  of  $1 \times 10^{-3}$

M R6G on a Si substrate.  $N_{SERS}$  and  $N_{REF}$  are the number of R6G molecules which excited by the laser. 
$$N_{SERS} = \frac{A_{SERS} \cdot V_{SERS} \cdot C_{SERS} \cdot N_A}{S_{SERS}}$$
, where  $S_{SERS}$  is dispersion area of R6G solution,  $A_{SERS}$  and is the area which irradiated by laser in AuNCs-AgNPs,  $V_{SERS}$ , and  $C_{SERS}$  are volume and concentration of R6G solution in AuNCs-AgNPs,  $N_{REF} = C_{REF} V_{REF} N_A$ . Similarly,  $V_{REF}$  and  $C_{REF}$  are volume and R6G on Si substrate, and  $N_A$  is the Avogadro constant. Where  $A_{SERS} = 1.22 \lambda / NA$ ,  $\lambda$  is incident wavelength (532 nm),  $NA = 0.5$ , the laser spot is  $\sim 1.3 \mu\text{m}^2$ . Raman test condition (laser power= 0.1%, Acquisition time=3s. Suppose that  $100 \mu\text{L}$   $1 \times 10^{-3}$  M R6G molecules are uniformly dispersed on the surface of SERS substrate, the surface area is  $0.25 \text{ cm}^2$ , laser spot ( $A_{SERS}$ ) was  $1.88 \mu\text{m}^2$ , The intensities at  $614 \text{ cm}^{-1}$  are 1357 and 63 for SERS substrate and REF Raman testing respectively.

$$N_{SERS} = \frac{1.3 \mu\text{m}^2 \cdot 100 \mu\text{L} \cdot 10^{-3} \text{ mol/L} \cdot N_A}{0.25 \text{ cm}^2} = 3.2 \times 10^9$$

$$N_{REF} = 10^{-3} \text{ mol/L} \cdot 100 \mu\text{L} \cdot N_A = 6.02 \times 10^{16}$$

The EF value of the  $614 \text{ cm}^{-1}$  band is calculated as follows:

$$EF_{R6G} = \frac{1357}{63} \cdot \frac{6.02 \times 10^{16}}{3.2 \times 10^9} = 4.05 \times 10^8$$

**Table S1.** The list of some SERS substrates together with its probe molecules, enhancement factors (EF) and detection limits (LOD).

| Fabrication method                          | Substrate material    | Compositions                 | Analyte | Enhancement factor   | LOD (M/L)  | References |
|---------------------------------------------|-----------------------|------------------------------|---------|----------------------|------------|------------|
| Self-assembly                               | Si wafer              | AgNPs-AuNCs PS array         | R6G     | $4.05 \times 10^8$   | $10^{-7}$  | This work  |
| Layer by layer                              | Si wafer              | Au NPs multilayer            | R6G     | $8.6 \times 10^6$    | -          | [S4]       |
| Nanoimprint and sputtering                  | PDMS <sup>a</sup>     | Au NPs                       | R6G     | $2.24 \times 10^7$   | $10^{-11}$ | [S5]       |
| X-ray interference lithography              | Si wafer              | Au nanodisk                  | R6G     | $1.0 \times 10^6$    | $10^{-8}$  | [S6]       |
| Electrodeposition                           | PET <sup>b</sup> film | Ag NPs                       | R6G     | $3.0 \times 10^7$    | $10^{-9}$  | [S7]       |
| AAO <sup>c</sup> -electron Beam evaporating | Al <sup>d</sup> base  | AgNCs                        | R6G     | $3.87 \times 10^6$   | $10^{-5}$  | [S8]       |
| Direct imprint                              | PET                   | Graphene@AuNCs               | R6G     | -                    | $10^{-6}$  | [S9]       |
| Laser interference lithography              | ITO <sup>e</sup>      | Au NPs                       | R6G     | $1.25 \times 10^5$   | $10^{-8}$  | [S10]      |
| Self-assembly                               | ITO                   | AuIoN <sup>f</sup>           | R6G     | $1.51 \times 10^6$   | -          | [S11]      |
| Self-assembly                               | Si wafer              | 3D SLNA <sup>g</sup> -Ag NPs | R6G     | $2.0 \times 10^{14}$ | $10^{-15}$ | [S12]      |

<sup>a</sup> PDMS: polydimethylsiloxane. <sup>b</sup>PET: polyethylene terephthalate. <sup>c</sup>AAO: anodic aluminum oxide. <sup>d</sup>Al: aluminum. <sup>e</sup>ITO: indium tin oxide. <sup>f</sup>AuIoN: Au Island over Nanospheres. SLNA: "sunflower-like" nanoarrays.

## References:

- (S1) E. C. Le Ru, E. Blackie, M. Meyer and P. G. Etchegoin, *J. Phys. Chem. C*, 2007, **111**, 13794–13803.
- (S2) A. N. Severyukhina, B. V. Parakhonskiy, E. S. Prikhozhdenko, D. A. Gorin, G. B. Sukhorukov, H. Möhwald and A. M. Yashchenok, *ACS Appl. Mater. Interfaces*, 2015, **7**, 15466-15473.
- (S3) Q. Qi, C. Liu, L. Liu, Q. Meng, S. Wei, A. Ming, J. Zhang, Y. Wang, L. Wu, X. Zhu, F. Wei and J. Yan, *Micromachines*, 2019, **10**, 1-12.
- (S4) L. Zhang, C. R. Guan, Y. Wang and J. H. Liao, *Nanoscale*, 2016, **8**, 5928-5937
- (S5) J. Cai, Z. H. Wang, M. J. Wang and D. Y. Zhang, *Appl. Surf. Sci.*, 2021, **541**, 148374.
- (S6) P. P. Zhang, S. M. Yang, L. S. Wang, J. Zhao, Z. C. Zhu, B. Liu, J. Zhong and X. H. Sun, *Nanotechnology*, 2014, **25**, 245301.
- (S7) R. K. Gao, X. F. Song, C. B. Zhan, C. G. Weng, S. Cheng, K. Guo, N. Ma, H. F. Chang, Z. Y. Guo, L. B. Luo, and L. D. Yu, *Sens. Actuators B: Chem.*, 2020, **314**, 128081.
- (S8) J. Wang, L. Q. Huang, L. P. Zhai, L. Yuan, L. H. Zhao, W. W. Zhang, D. Z. Shan, A. W. Hao, X. H. Feng and J. Zhu, *Appl. Surf. Sci.*, 2012, **261**, 605-609.
- (S9) K. L. Long, X. G. Luo, H. Y. Nan, D. Y. Du, W. W. Zhao, Z. H. Ni and T. Qiu, *J. Appl. Phys.*, 2013, **114**, 183520.
- (S10) J. S. Hwang and M. Yang, *Sensors*, 2018, **18**, 4076.
- (S11) A. Purwidyantri, C. H. Hsu, C. M. Yang, B. A. Prabowo, Y. C. Tiang and C. S. Lai, *RSC Adv.*, 2019, **9**, 4982-4992.
- (S12) X. L. Zhang, Z. G. Dai, W. Wu, X. G. Zhang, L. Fu and C. Z. Jiang, *Nanoscale*, 2017, **9**, 3114-3120.
